# Supplementary material for: Is there any room for PD-1 inhibitors in combination with platinum-based chemotherapy as frontline treatment of extensive-stage small cell lung cancer? A systematic review and meta-analysis with indirect comparisons among subgroups and landmark survival analyses
Source: PubMed Central journal article supplement — Ther Adv Med Oncol. 2021 Jul 21;13:17588359211018018. doi: 10.1177/17588359211018018 (PMC8504650; doi:10.1177/17588359211018018), 2021-07-21
Supplement: sj-pdf-1-tam-10.1177_17588359211018018.pdf [file sj-pdf-1-tam-10.1177_17588359211018018.pdf]

## Electronic search strategy

1. We used a search strategy for randomized controlled trials (RCT) in Medline through Pubmed. The same search was then modified for RCT searches in other databases (Scopus, Controlled Cochrane Trial Register - CCTR).

The query was adapted from Robinson & coll: **[Robinson KA, Dickersin K. Development of a highly sensitive search strategy for the retrieval of reports of controlled trials using PubMed. International journal of epidemiology 2002;31:150-153].**

("sclc"[tiab] OR "Small Cell Lung Carcinoma"[Mesh] OR "small cell lung cancer"[tiab]) AND ("nivolumab" [MeSH] OR "nivolumab" [tiab] OR "Opdivo" [tiab] OR "pembrolizumab" [Supplementary concept] OR "pembrolizumab" [tiab] OR "Keytruda" [tiab] OR "ipilimumab" [MeSH] OR "ipilimumab" [tiab] OR "Yervoy" [tiab] OR "atezolizumab" [Supplementary concept] OR "atezolizumab" [tiab] OR "Tecentriq" [tiab] OR "durvalumab" [Supplementary concept] OR durvalumab [tiab] OR Imfinzi [tiab] OR "tremelimumab"[tiab] OR "tremelimumab" [Supplementary Concept]) NOT "non-small-cell lung cancer"[tiab])

ID Search Hits

#1 MeSH descriptor: [Small Cell Lung Carcinoma] explode all trees 377

#2 sclc:ti or sclc:ab 1299

#3 "small cell lung cancer":ti or "small cell lung cancer":ab 12327

#4 #1 OR #2 OR #3 12559

#5 MeSH descriptor: [Carcinoma, Non-Small-Cell Lung] explode all trees 4241

#6 NSCLC:ti or NSCLC:ab 8911

#7 #5 OR #6 10478

#8 #4 NOT #7 4251

#9 MeSH descriptor: [Nivolumab] explode all trees 419

#10 nivolumab 1662

#11 ipilimumab 1148

#12 atezolizumab 695

#13 pembrolizumab 1431

#14 durvalumab 521

#15 MeSH descriptor: [Ipilimumab] explode all trees 171

#16 tremelimumab 256

#17 #9 OR #10 OR #11 OR #12 OR #13 OR #14 OR #15 OR #16 4367

#18 #8 AND #17 199

2. We used the free text strategy

*Advanced or extensive stage and SCLC and immunocheckpoint or immunotherapy*

3. We searched meta-analyses for any other published data concerning SCLC and immune-checkpoint or immunotherapy.

The strategy in Pubmed for meta-analysis searching was:

*Immunocheckpoint [tiab] OR immunotherapy AND "Small Cell Lung Carcinoma"[Mesh] OR SCLC [tiab] AND meta-analysis[pt]*

for RCT on-line searches in Clinical Trials registers ([www.clinicaltrials.gov](http://www.clinicaltrials.gov))
