# Supplementary figures and images for: Is there any room for PD-1 inhibitors in combination with platinum-based chemotherapy as frontline treatment of extensive-stage small cell lung cancer? A systematic review and meta-analysis with indirect comparisons among subgroups and landmark survival analyses
Source: PubMed Central journal article supplement — Ther Adv Med Oncol. 2021 Jul 21;13:17588359211018018. doi: 10.1177/17588359211018018 (PMC8504650; doi:10.1177/17588359211018018), 2021-07-21

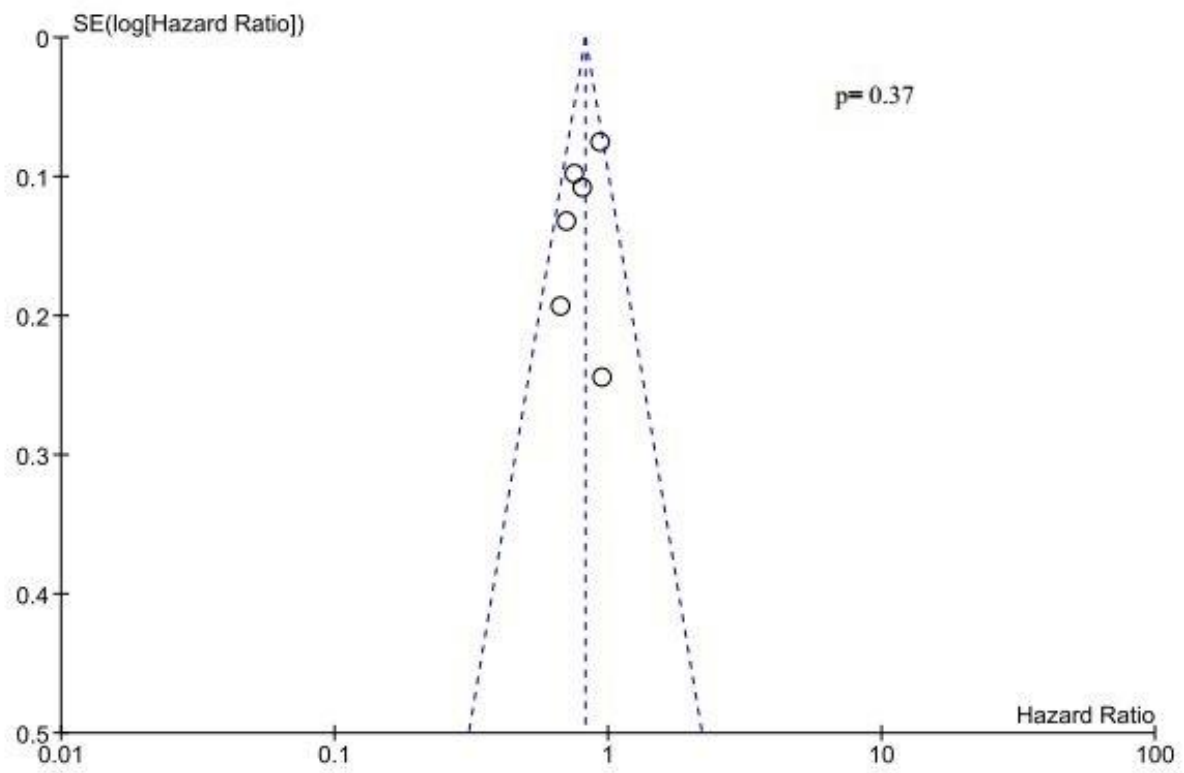

Supplement: sj-pdf-3-tam-10.1177_17588359211018018.pdf [file sj-pdf-3-tam-10.1177_17588359211018018.pdf]

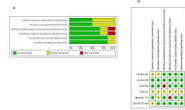

Supplement: sj-pdf-4-tam-10.1177_17588359211018018.pdf [file sj-pdf-4-tam-10.1177_17588359211018018.pdf]
